# Supplementary material
Source: PubMed Central journal article supplement (PMC5599217)
Supplement: NIHMS899607-supplement-supplemental.pdf [file NIHMS899607-supplement-supplemental.pdf]

## **Supporting Information.**

### **A Multidimensional Analytical Comparison of Remicade and the Biosimilar Remsima.**

Karthik Pisupati<sup>1,2†</sup>, Yuwei Tian<sup>3</sup>, Solomon Okbazghi<sup>4</sup>, Alexander Benet<sup>1,2</sup>, Rose Ackermann<sup>1,2</sup>, Michael Ford<sup>5</sup>, Sergei Saveliev<sup>6</sup>, Christopher M. Hosfield<sup>6</sup>, Marjeta Urh<sup>6</sup>, Eric Carlson<sup>7</sup>, Christopher Becker<sup>7</sup>, Thomas J. Tolbert<sup>4</sup>, Steven P. Schwendeman<sup>1,2,8</sup>, Brandon T. Ruotolo<sup>3,\*</sup>, Anna Schwendeman<sup>1,2\*</sup>

<sup>1</sup> Department of Pharmaceutical Sciences, University of Michigan, 428 Church Street, Ann Arbor, MI 48109

<sup>2</sup> Biointerfaces Institute, University of Michigan, 2800 Plymouth Road, Ann Arbor, MI 48109

<sup>3</sup> Department of Chemistry, University of Michigan, 930 North University Street, Ann Arbor, MI 48109

<sup>4</sup> Department of Pharmaceutical Chemistry, University of Kansas, 2010 Becker Drive, Lawrence, KS 66047

<sup>5</sup> MS Bioworks, 3950 Varsity Drive, Ann Arbor, MI 48108

<sup>6</sup> Promega Corporation, 2800 Woods Hollow Road, Fitchburg, WI 53711

<sup>7</sup> Protein Metrics Inc., 1622 San Carlos Avenue, San Carlos, CA 94070.

<sup>8</sup> Department of Biomedical Engineering, University of Michigan, 2200 Bonisteel Boulevard, Ann Arbor, MI 48109

## Table of Contents

|                                                                                                                                                                                                                                                                                                                                                                                                                                                                                                                                                                               |   |
|-------------------------------------------------------------------------------------------------------------------------------------------------------------------------------------------------------------------------------------------------------------------------------------------------------------------------------------------------------------------------------------------------------------------------------------------------------------------------------------------------------------------------------------------------------------------------------|---|
| Figure S- 1: Glycation of Remicade and Remsima. A, average sum of percent glycated peptides for Remicade and Remsima peptides after Glu-C digest B, Levels of glycation of specific Lys residues determined after Glu-C digest. (n= 4 lots each, average $\pm$ S.D.) .....                                                                                                                                                                                                                                                                                                    | 3 |
| Figure S- 2: Binding kinetics of infliximab samples to Fc $\gamma$ R11a receptors. Representative binding curves to in vitro Fc $\gamma$ R11a receptors for a given lot of A, Remicade or B, Remsima measured via biolayer interferometry using BLITZ instrument. Calculated C, equilibrium disassociation ( $K_D$ ), D, on ( $k_a$ ), and D, off ( $k_d$ ) rates for each of the lots of Remicade and Remsima using 1:1 fitting model with BLITZPro software. The data shown are mean $\pm$ SEM for each lot of Remicade or Remsima (n = 3 measurements per each lot). ..... | 4 |
| Figure S- 3: Dimers of Remicade and Remsima. Representative IM-MS spectra of dimer species of A, Remicade and B, Remsima with annotated charges. C, Representative size exclusion chromatography (SEC) profiles of Remicade (blue) and Remsima (orange). Inset shows the dimer peaks. ....                                                                                                                                                                                                                                                                                    | 5 |
| Table S- 1: Intact Mass Analysis. ....                                                                                                                                                                                                                                                                                                                                                                                                                                                                                                                                        | 6 |
| Table S- 2: Oxidations and deamidations of Remicade and Remsima.....                                                                                                                                                                                                                                                                                                                                                                                                                                                                                                          | 7 |
| Table S- 3: Glycan profiles for Remicade and Remsima. ....                                                                                                                                                                                                                                                                                                                                                                                                                                                                                                                    | 8 |
| Table S- 4: Relative Abundance (%) of Remicade and Remsima Aggregates.....                                                                                                                                                                                                                                                                                                                                                                                                                                                                                                    | 9 |

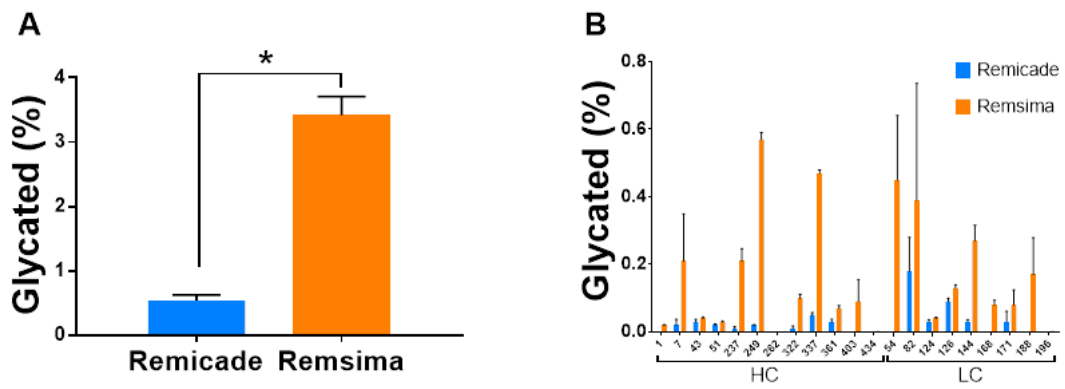

**Figure S- 1: Glycation of Remicade and Remsima.** **A**, average sum of percent glycosylated peptides for Remicade and Remsima peptides after Glu-C digest **B**, Levels of glycation of specific Lys residues determined after Glu-C digest. (n= 4 lots each, average  $\pm$  S.D.)

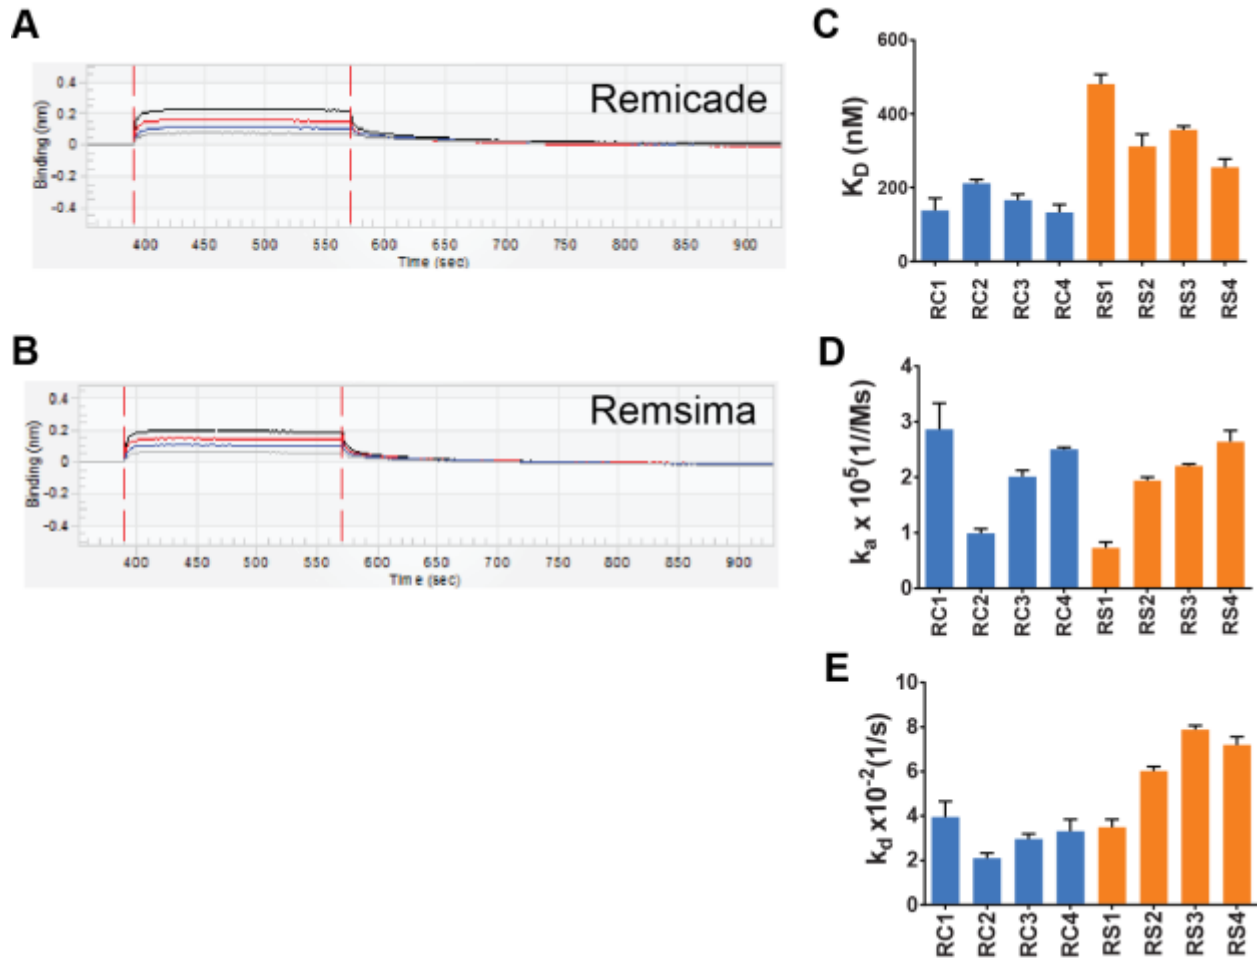

**Figure S- 2: Binding kinetics of infliximab samples to Fc $\gamma$ RIIIa receptors.** Representative binding curves to in vitro Fc $\gamma$ RIIIa receptors for a given lot of A, Remicade or B, Remsima measured via biolayer interferometry using BLITZ instrument. Calculated C, equilibrium disassociation ( $K_D$ ), D, on ( $k_a$ ), and D, off ( $k_d$ ) rates for each of the lots of Remicade and Remsima using 1:1 fitting model with BLITZPro software. The data shown are mean  $\pm$  SEM for each lot of Remicade or Remsima (n = 3 measurements per each lot).

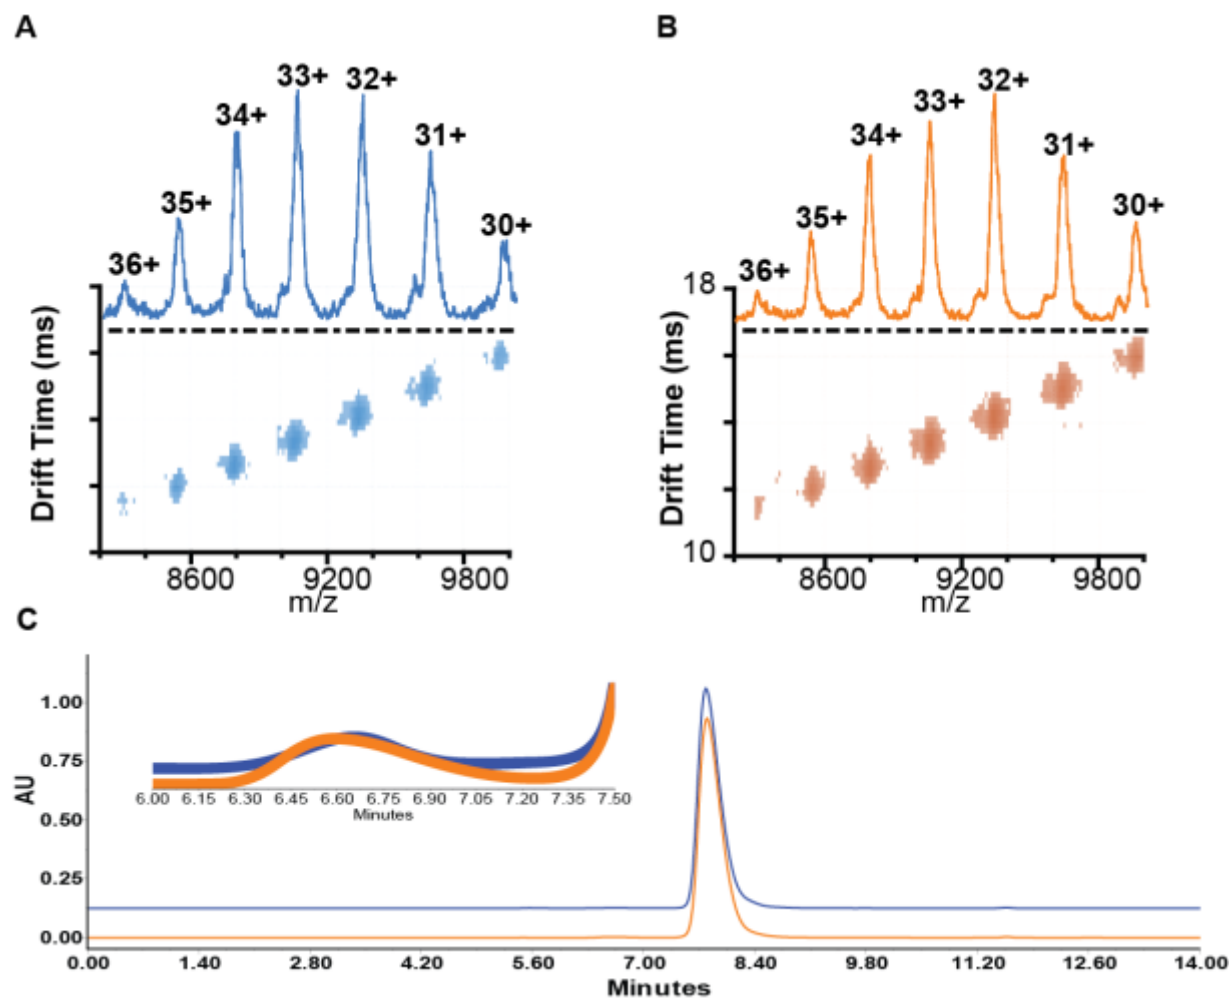

**Figure S- 3: Dimers of Remicade and Remsima.** Representative IM-MS spectra of dimer species of A, Remicade and B, Remsima with annotated charges. C, Representative size exclusion chromatography (SEC) profiles of Remicade (blue) and Remsima (orange). Inset shows the dimer peaks.

**Table S- 1: Intact Mass Analysis.**

|                              | <b>Remicade</b> | <b>Remsima</b> | <b>P value</b> |
|------------------------------|-----------------|----------------|----------------|
| Intact mass<br>(kDa)         | 149382 ± 222    | 149695 ± 372   | N.S.           |
| Deglycosylated<br>mass (kDa) | 146066 ± 38     | 146076 ± 51    | N.S.           |
| % C-term (-)<br>Lys          | 72.0 ± 3.5      | 62.0 ± 10.8    | N.S.           |
| % H or 2L                    | 2.34 ± 0.57     | 0.09 ± 0.13    | .001           |
| % H1L1                       | 0.09 ± 0.13     | 0.88 ± 0.32    | .01            |
| % H2                         | 0.83 ± 0.10     | 1.36 ± 0.25    | .02            |

**Table S- 2: Oxidations and deamidations of Remicade and Remsima.**

| <b>Modification Name</b> | <b>Modification Site</b> | <b>Remicade</b> |                 | <b>Remsima</b> |                 |
|--------------------------|--------------------------|-----------------|-----------------|----------------|-----------------|
|                          |                          | <b>Aver, %</b>  | <b>Stdev, %</b> | <b>Aver, %</b> | <b>Stdev, %</b> |
| Oxidation                | M-55                     | 1.840           | 0.149           | 2.043          | 0.135           |
| Oxidation                | W-35                     | 0.772           | 0.063           | 0.827          | 0.081           |
| Oxidation                | W-94                     | 1.590           | 0.269           | 2.285          | 0.323           |
| Oxidation                | M-18                     | 6.709           | 1.153           | 6.944          | 1.773           |
| Oxidation                | M-34                     | 26.444          | 4.181           | 28.694         | 3.946           |
| Oxidation                | M-85                     | 1.695           | 0.282           | 2.084          | 0.094           |
| Oxidation                | M-255                    | 20.802          | 1.241           | 21.531         | 1.157           |
| Oxidation                | M-431                    | 2.404           | 0.314           | 2.540          | 0.222           |
| Oxidation                | W-47                     | 0.981           | 0.052           | 1.050          | 0.126           |
| Oxidation                | W-110                    | 0.997           | 0.129           | 1.065          | 0.242           |
| Oxidation                | W-316                    | 0.816           | 0.067           | 0.934          | 0.198           |
| Deamidation              | N-137                    | 0.052           | 0.004           | 0.060          | 0.008           |
| Deamidation              | N-138                    | 0.021           | 0.007           | 0.021          | 0.008           |
| Deamidation              | N-152                    | 0.431           | 0.184           | 0.376          | 0.271           |
| Deamidation              | N-158                    | 1.293           | 0.078           | 1.210          | 0.782           |
| Deamidation              | N-31                     | 1.426           | 0.018           | 1.449          | 0.048           |
| Deamidation              | N-57                     | 1.892           | 0.108           | 2.663          | 0.092           |
| Deamidation              | N-318                    | 0.408           | 0.022           | 0.392          | 0.039           |
| Deamidation              | N-364                    | 0.593           | 0.155           | 0.583          | 0.250           |
| Deamidation              | N-387                    | 1.972           | 0.218           | 1.297          | 0.115           |
| Deamidation              | N-392                    | 1.338           | 0.185           | 0.615          | 0.091           |
| Deamidation              | N-424                    | 2.063           | 0.030           | 2.130          | 0.016           |

**Table S- 3: Glycan profiles for Remicade and Remsima.**

| Modifications Name                    | Abbreviated Name | Remicade |       | Remsima |       |
|---------------------------------------|------------------|----------|-------|---------|-------|
|                                       |                  | Average  | Stdev | Average | Stdev |
| HexNAc(4)Hex(3)Fuc(1)                 | G0F              | 48.93%   | 1.85% | 40.74%  | 0.45% |
| HexNAc(4)Hex(4)Fuc(1)                 | G1F              | 21.63%   | 2.09% | 37.03%  | 0.55% |
| HexNAc(2)Hex(5)                       | Man 5            | 7.82%    | 0.85% | 6.46%   | 0.43% |
| HexNAc(3)Hex(3)Fuc(1)                 | G0F-Man          | 6.10%    | 0.82% | 1.60%   | 0.05% |
| HexNAc(3)Hex(5)                       | G0-Man(3)        | 3.89%    | 0.43% | 0.40%   | 0.06% |
| HexNAc(4)Hex(5)Fuc(1)                 | G2F              | 2.99%    | 0.56% | 6.41%   | 0.20% |
| HexNAc(3)Hex(3)                       | G0-GlcNAc        | 2.07%    | 0.23% | 0.43%   | 0.03% |
| HexNAc(3)Hex(4)                       | G1-GlcNAc        | 1.71%    | 0.18% | 0.22%   | 0.02% |
| HexNAc(4)Hex(3)                       | G0               | 1.47%    | 0.16% | 0.68%   | 0.04% |
| HexNAc(4)Hex(5)Fuc(0)NeuAc(1)         | G2S1             | 1.32%    | 0.29% | 3.56%   | 0.53% |
| HexNAc(4)Hex(4)                       | G1               | 0.58%    | 0.14% | 0.54%   | 0.10% |
|                                       | Bisecting        |          |       |         |       |
| HexNAc(4)Hex(6)Fuc(1)                 | GlcNAc-F         | 0.32%    | 0.08% | 0.50%   | 0.04% |
| HexNAc(2)Hex(4)                       | Man 4            | 0.16%    | 0.03% | 0.11%   | 0.01% |
| HexNAc(2)Hex(6)                       | Man 6            | 0.18%    | 0.03% | 0.21%   | 0.02% |
| HexNAc(4)Hex(5)Fuc(0)NeuAc(0)NeuGc(2) | G2N2             | 0.04%    | 0.07% | 0.02%   | 0.03% |
| HexNAc(2)Hex(3)                       | Man 3            | 0.27%    | 0.09% | 0.41%   | 0.04% |
| HexNAc(1)                             | Man 7            | 0.10%    | 0.01% | 0.06%   | 0.02% |
| HexNAc(2)Hex(3)Fuc(1)                 | Man 3-F          | 0.09%    | 0.01% | 0.01%   | 0.00% |
| HexNAc(2)Hex(7)                       | Man 7            | 0.07%    | 0.01% | 0.08%   | 0.01% |
| HexNAc(2)Hex(5)Fuc(1)                 | Man 5-F          | 0.04%    | 0.01% | 0.02%   | 0.01% |
| HexNAc(4)Hex(5)Fuc(1)NeuAc(0)NeuGc(2) | G2FN2            | 0.12%    | 0.05% | 0.40%   | 0.10% |
| HexNAc(1)Fuc(1)                       | *                | 0.04%    | 0.01% | 0.02%   | 0.00% |
| HexNAc(2)Hex(8)                       | Man 8            | 0.04%    | 0.01% | 0.06%   | 0.01% |
| HexNAc(2)Hex(4)Fuc(1)                 | Man 4-F          | 0.02%    | 0.01% | 0.00%   | 0.00% |
| HexNAc(4)Hex(5)Fuc(1)NeuAc(1)         | G2FS1            | 0.03%    | 0.00% | 0.05%   | 0.01% |
| HexNAc(2)Fuc(1)                       | *                | 0.00%    | 0.00% | 0.01%   | 0.00% |
| HexNAc(4)Hex(5)Fuc(1)NeuAc(1)NeuGc(1) | G2FS1N1          | 0.00%    | 0.00% | 0.01%   | 0.00% |
| HexNAc(4)Hex(5)Fuc(1)NeuAc(2)         | G2FS2            | 0.00%    | 0.00% | 0.00%   | 0.00% |
| <hr/>                                 |                  |          |       |         |       |
| A-fucosylated                         |                  | 19.70%   | 1.57% | 13.22%  | 3.75% |
| Mannose terminated                    |                  | 14.86%   | 1.53% | 9.01%   | 3.11% |
| Immunogenic (NANA)                    |                  | 1.35%    | 0.29% | 3.61%   | 1.32% |
| Anti-inflammatory (NGNA)              |                  | 0.17%    | 0.03% | 0.42%   | 0.18% |



**Table S- 4: Relative Abundance (%) of Remicade and Remsima Aggregates.**

|                | <b>Remicade</b> | <b>Remsima</b> | <b>P value</b> |
|----------------|-----------------|----------------|----------------|
| Dimer (SEC)    | 0.06 ± 0.01     | 0.37 ± 0.09    | .001           |
| Oligomer (SEC) | 0.04 ± 0.03     | 0.03 ± 0.01    | N.S.           |
| Dimer (IM-MS)  | 0.78 ± 0.22     | 1.26 ± 0.99    | N.S.           |
